# Supplementary material for: Synthesis of thin film AuPd alloys and their investigation for electrocatalytic CO2reduction
Source: Royal Society of Chemistry journal article supplement (doi:10.1039/c5ta04863j), 2015-01-01
Supplement: c5ta04863j1.pdf [file c5ta04863j1.pdf]

# Synthesis of Thin Film AuPd Alloys and their Investigation for Electrocatalytic CO<sub>2</sub> Reduction

*Christopher Hahn<sup>†‡</sup>, David N. Abram<sup>†</sup>, Heine A. Hansen<sup>‡</sup>, Toru Hatsukade<sup>†</sup>, Ariel Jackson<sup>⊥</sup>,  
Natalie C. Johnson<sup>§</sup>, Thomas R. Hellstern<sup>†</sup>, Kendra P. Kuhl<sup>||</sup>, Etosha R. Cave<sup>∇</sup>, Jeremy T.  
Feaster<sup>†</sup>, and Thomas F. Jaramillo<sup>†‡\*</sup>*

<sup>†</sup>Department of Chemical Engineering, Stanford University, California 94305

<sup>‡</sup>SUNCAT Center for Interface Science and Catalysis, SLAC National Accelerator Laboratory,  
Menlo Park, California 94025

<sup>⊥</sup>Department of Materials Science and Engineering, Stanford University, California 94305

<sup>§</sup>Department of Geological and Environmental Sciences, Stanford University, California, 94305

<sup>||</sup>Department of Chemistry, Stanford University, California, 94305

<sup>∇</sup>Department of Mechanical Engineering, Stanford University, California, 94305

\*Address correspondence to [jaramillo@stanford.edu](mailto:jaramillo@stanford.edu)

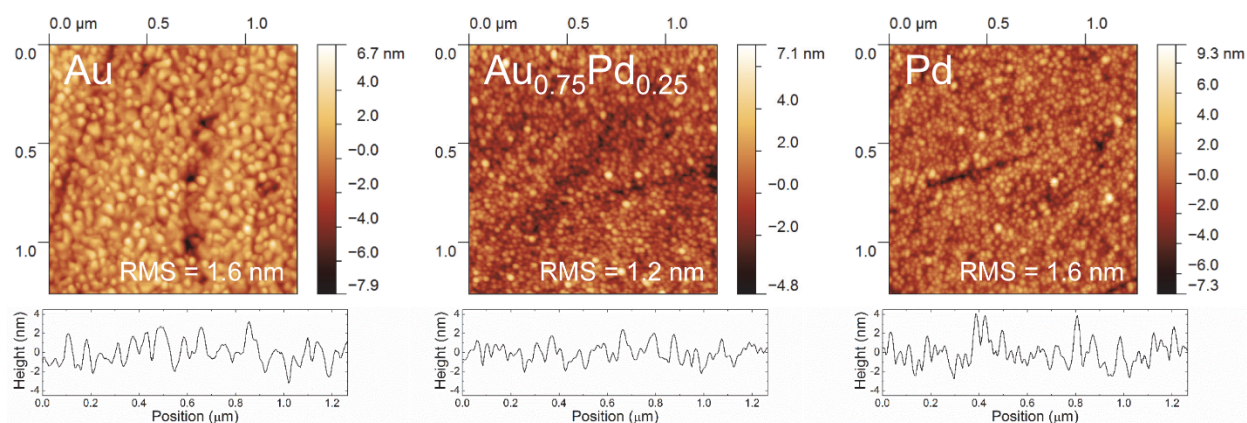

**Figure SI1.** AFM images of AuPd thin films, revealing their RMS roughness values. The graphs below each AFM image correspond to a horizontal line scan across the sample.

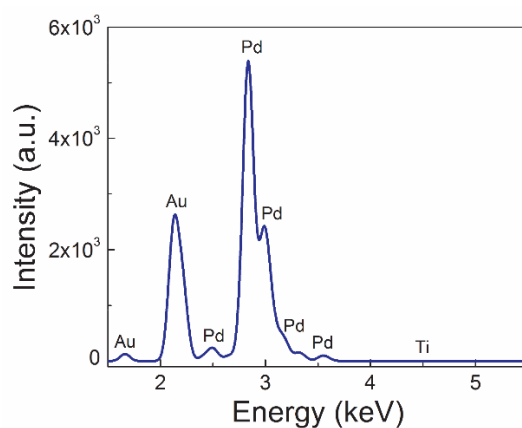

**Figure SI2.** EDS spectrum of AuPd thin film sample F. No Ti signal was detected within the AuPd layer.

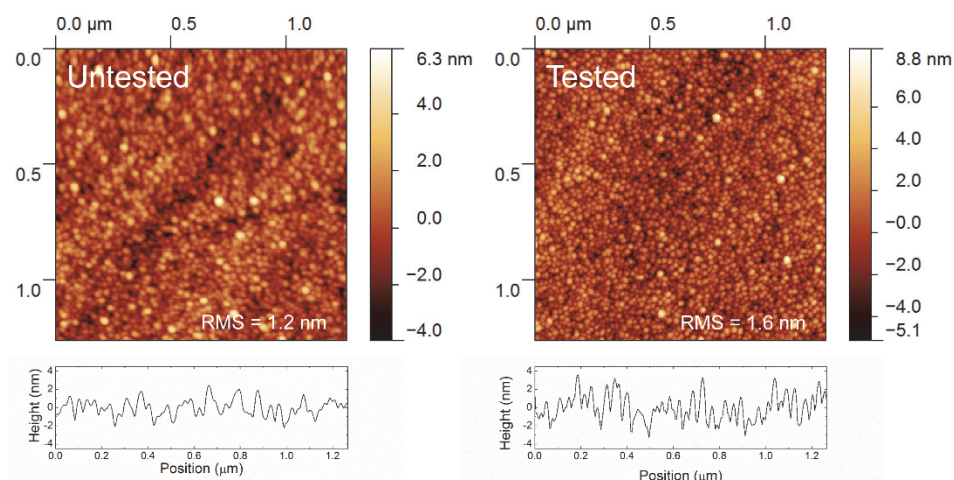

**Figure SI3.** AFM images of a AuPd thin film before and after electrochemical testing. Quantitative analysis confirms that the “Untested” and “Tested” regions have a similar RMS roughness values after testing, indicating that the sample retains a similar surface area.
